# Supplementary material for: The miR27b-CCNG1-P53-miR-508-5p axis regulates multidrug resistance of gastric cancer
Source: PubMed Central journal article supplement (PMC4808016; doi:10.18632/oncotarget.6374), 2015-11-23
Supplement: oncotarget-07-0538-s001.pdf [file oncotarget-07-0538-s001.pdf]

## SUPPLEMENTARY FIGURES AND TABLE

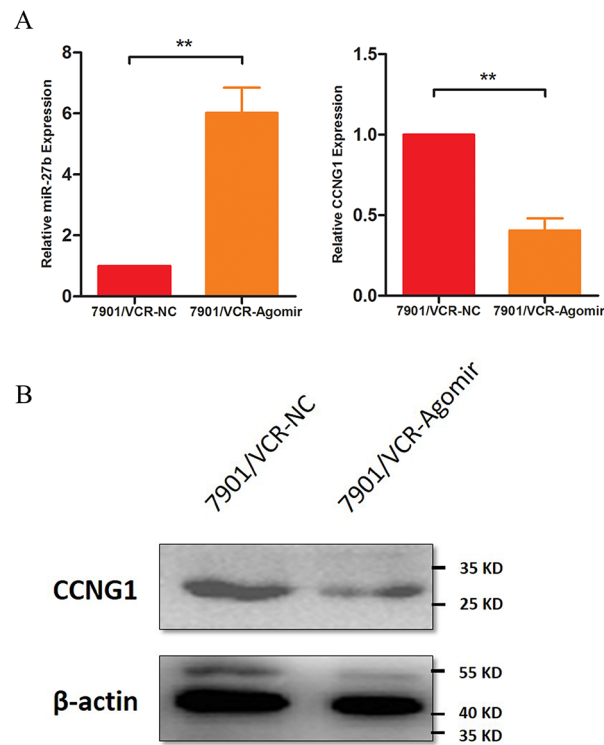

**Supplementary Figure S1: miR-27b suppresses CCNG1 *in vivo*.** **A.** qRT-PCR analysis of CCNG1 in tumors treated with miR-27b agomir or control. **\*\*** $P < 0.01$ . **B.** Western blotting analysis of CCNG1 in tumors treated with miR-27b agomir or control.

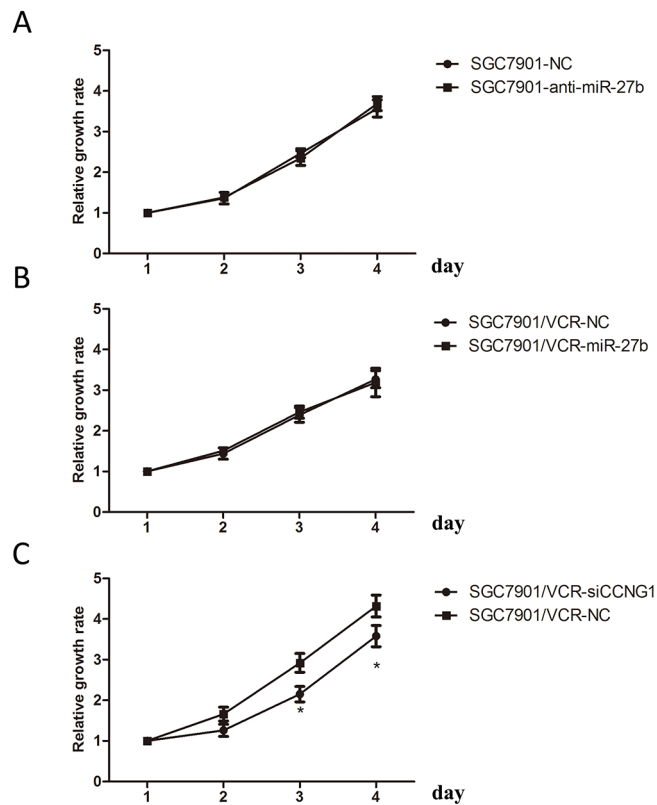

**Supplementary Figure S2: The effects of miR-27b and CCNG1 on cell proliferation.** **A.** Inhibitors for miR-27b was transfected into SGC7901 cells and cell proliferation was measured by MTT assays. **B.** SGC7901/VCR cells were transfected with mimics for miR-27b and MTT assays were performed to examine cell proliferation. **C.** Knockdown of CCNG1 by siRNAs in SGC7901/VCR cells suppressed cell proliferation. \* $P < 0.05$ .

Supplementary Table S1: The association of miR-27b and miR-508-5p with the clinicopathologic features in GC tissues from tissue microarrays

| Variables                      | N   | miR-27b |    |    |     | P    | miR-508-5p |    |    |     | P    |
|--------------------------------|-----|---------|----|----|-----|------|------------|----|----|-----|------|
|                                |     | -       | +  | ++ | +++ |      | -          | +  | ++ | +++ |      |
| <i>Age</i>                     |     |         |    |    |     | 0.99 |            |    |    |     | 0.89 |
| ≥ 60                           | 101 | 13      | 25 | 29 | 34  |      | 14         | 31 | 30 | 26  |      |
| < 60                           | 13  | 2       | 3  | 4  | 4   |      | 1          | 5  | 4  | 3   |      |
| <i>Gender</i>                  |     |         |    |    |     | 0.35 |            |    |    |     | 0.17 |
| Male                           | 53  | 6       | 17 | 15 | 15  |      | 10         | 19 | 12 | 12  |      |
| Female                         | 61  | 9       | 11 | 18 | 23  |      | 5          | 17 | 22 | 17  |      |
| <i>Differentiation</i>         |     |         |    |    |     | 0.61 |            |    |    |     | 0.32 |
| Well - Moderate                | 40  | 3       | 10 | 13 | 14  |      | 7          | 11 | 9  | 13  |      |
| Poor                           | 74  | 12      | 18 | 20 | 24  |      | 8          | 25 | 25 | 16  |      |
| <i>T</i>                       |     |         |    |    |     | 0.69 |            |    |    |     | 0.23 |
| T <sub>1</sub> -T <sub>2</sub> | 15  | 1       | 5  | 5  | 4   |      | 2          | 8  | 2  | 3   |      |
| T <sub>3</sub> -T <sub>4</sub> | 99  | 14      | 23 | 28 | 34  |      | 13         | 28 | 32 | 26  |      |
| <i>N</i>                       |     |         |    |    |     | 0.11 |            |    |    |     | 0.54 |
| N <sub>0</sub> -N <sub>1</sub> | 49  | 10      | 14 | 13 | 12  |      | 6          | 13 | 18 | 12  |      |
| N <sub>2</sub> -N <sub>3</sub> | 65  | 5       | 14 | 20 | 26  |      | 9          | 23 | 16 | 17  |      |
| <i>Metastasis</i>              |     |         |    |    |     | 0.88 |            |    |    |     | 0.38 |
| M <sub>1</sub>                 | 10  | 1       | 3  | 2  | 4   |      | 0          | 3  | 5  | 2   |      |
| M <sub>0</sub>                 | 104 | 14      | 25 | 31 | 34  |      | 15         | 33 | 29 | 27  |      |
| <i>AJCC Staging</i>            |     |         |    |    |     | 0.23 |            |    |    |     | 0.22 |
| I-II                           | 48  | 9       | 11 | 16 | 12  |      | 3          | 17 | 17 | 11  |      |
| III-IV                         | 66  | 6       | 17 | 17 | 26  |      | 12         | 19 | 17 | 18  |      |
